# Supplementary material for: Identification of sulphur in nail polish by pattern recognition methods combined with portable energy dispersive X-ray fluorescence spectral data
Source: Royal Society of Chemistry journal article supplement (doi:10.1039/c6ay00195e), 2016-01-01
Supplement: c6ay00195e1.pdf [file c6ay00195e1.pdf]

IDENTIFICATION OF SULPHUR IN NAIL POLISH BY PATTERN  
RECOGNITION METHOD OF PORTABLE ENERGY DISPERSIVE X-RAY  
FLUORESCENCE SPECTRAL DATA

Fábio L. Melquiades<sup>1\*</sup>, Alanna Mattos Alves da Silva<sup>2</sup>

Supplemental Material

Table S1. Characteristics of the studied nails polish. The column weight refers to the mass of samples applied in the support surface.

| Number | Brand | Type        | Color          | Weight (g) |
|--------|-------|-------------|----------------|------------|
| 1      | B     | Varnish     | Coral          | 0.0417     |
| 2      | A     | Metallic    | Purple         | 0.0496     |
| 3      | C     | Cream       | Yellow         | 0.0352     |
| 4      | A     | Cream       | Red            | 0.0222     |
| 5      | A     | Ultra Cream | Green          | 0.0351     |
| 6      | A     | Metallic    | Red            | 0.0386     |
| 7      | A     | Ultra Cream | Blue           | 0.0628     |
| 8      | A     | Sparkling   | Red            | 0.0366     |
| 9      | A     | Cream       | Beige          | 0.0361     |
| 10     | A     | Ultra Cream | Pink           | 0.0399     |
| 11     | A     | Metallic    | Black - Purple | 0.0569     |
| 12     | A     | Metallic    | Red            | 0.0307     |
| 13     | A     | Natural     | Champagne      | 0.0851     |
| 14     | A     | Metallic    | Brown          | 0.0228     |
| 15     | A     | Cream       | Beige          | 0.0388     |
| 16     | A     | Ultra Cream | Pink           | 0.0481     |
| 17     | A     | Sparkling   | Transparent    | 0.0645     |
| 18     | A     | Cream       | Orange         | 0.0287     |
| 19     | B     | Varnish     | Red            | 0.0258     |
| 20     | B     | Cream       | Red            | 0.0267     |
| 21     | B     | Varnish     | Gold           | 0.0432     |
| 22     | B     | Glitter     | Transparent    | 0.0281     |
| 23     | B     | Sparkling   | Champanhe      | 0.0252     |
| 24     | F     | Metallic    | Red            | 0.0618     |
| 25     | D     | Cream       | Pink           | 0.0334     |
| 26     | D     | Cream       | Purple         | 0.0571     |
| 27     | D     | Cream       | Red            | 0.0321     |
| 28     | D     | Cream       | Pink           | 0.0469     |

| <b>Number</b> | <b>Brand</b> | <b>Type</b> | <b>Color</b> | <b>Weight<br/>(g)</b> |
|---------------|--------------|-------------|--------------|-----------------------|
| 29            | D            | Cream       | Purple       | 0.0296                |
| 30            | D            | Cream       | Pink         | 0.0467                |
| 31            | C            | Cream       | Red          | 0.0421                |
| 32            | D            | Glitter     | Transparent  | 0.0371                |
| 33            | F            | Cream       | Red          | 0.0281                |
| 34            | F            | Cream       | Pink         | 0.0300                |
| 35            | F            | Sparkling   | Gold         | 0.0229                |
| 36            | F            | Cream       | White        | 0.0529                |
| 37            | E            | Sparkling   | Carmines     | 0.0354                |
| 38            | E            | Cream       | Red          | 0.0266                |
| 39            | E            | Cream       | Red          | 0.0541                |
| 40            | E            | Cream       | Carmines     | 0.0432                |
| 41            | F            | Cream       | Green        | 0.0295                |
| 42            | A            | Ultra Cream | Purple       | 0.0267                |
| 43            | A            | Metallic    | Gray         | 0.0291                |
| 44            | A            | Cream       | Red          | 0.0405                |
| 45            | A            | Metallic    | Blue         | 0.0309                |
| 46            | A            | Cream       | Red          | 0.0202                |
| 47            | A            | Sparkling   | Transparent  | 0.0444                |
| 48            | B            | Cream       | Blue         | 0.0502                |
| 49            | B            | Varnish     | Red          | 0.0402                |
| 50            | A            | Cream       | Red          | 0.0178                |
| 51            | B            | Cream       | Black        | 0.0312                |
| 52            | F            | Cream       | Pink         | 0.0442                |
| 53            | F            | Cream       | Red          | 0.0622                |
| 54            | F            | Cream       | Green        | 0.0402                |
| 55            | C            | Cream       | Red          | 0.0471                |
| 56            | C            | Cream       | Black        | 0.0562                |
| 57            | F            | Magnetic    | Gray         | 0.0326                |
| 58            | B            | Sparkling   | Salmon       | 0.0502                |
| 59            | A            | Matte       | Red          | 0.0442                |
| 60            | B            | Sparkling   | Gold         | 0.0382                |
| 61            | F            | Sparkling   | Salmon       | 0.0462                |
| 62            | A            | Sparkling   | Gold         | 0.0452                |
| 63            | B            | Cream       | Red          | 0.0425                |
| 64            | F            | Cream       | Yellow       | 0.0478                |
| 65            | E            | Sparkling   | Green        | 0.0528                |
| 66            | E            | Cream       | Orange       | 0.0470                |
| 67            | F            | Cream       | Purple       | 0.0480                |
| 68            | A            | Cream       | Pink         | 0.0521                |
| 69            | D            | Cream       | Pink         | 0.0219                |

| <b>Number</b> | <b>Brand</b> | <b>Type</b> | <b>Color</b> | <b>Weight<br/>(g)</b> |
|---------------|--------------|-------------|--------------|-----------------------|
| 70            | F            | Sparkling   | Orange       | 0.0456                |
| 71            | A            | Cream       | Brown        | 0.0430                |
| 72            | A            | Matte       | Blue         | 0.0495                |
| 73            | B            | Varnish     | Red          | 0.0665                |
| 74            | B            | Pearly      | Pink         | 0.0670                |
| 75            | C            | Pearly      | Carmines     | 0.0686                |
| 76            | A            | Cream       | Red          | 0.0416                |
| 77            | B            | Cream       | Beige        | 0.0423                |
| 78            | D            | Pearly      | Gold         | 0.0383                |
| 79            | B            | Cream       | Purple       | 0.0355                |
| 80            | A            | Ultra Cream | Navy blue    | 0.0511                |
| 81            | D            | Cream       | Pink         | 0.0484                |
| 82            | C            | Cream       | Pink         | 0.0352                |
| 83            | B            | Cream       | Purple       | 0.0281                |
| 84            | C            | Pearly      | Brown        | 0.0512                |
| 85            | B            | Cream       | Gray         | 0.0455                |
| 86            | A            | Metallic    | Champagne    | 0.0400                |
| 87            | A            | Cream       | Brown        | 0.0405                |
| 88            | B            | Varnish     | Pink         | 0.0639                |
| 89            | E            | Cream       | Violet       | 0.0583                |
| 90            | A            | Cream       | White        | 0.0405                |
| 91            | A            | Sparkling   | Transparent  | 0.0469                |
| 92            | B            | Cream       | Coral        | 0.0410                |
| 93            | B            | Varnish     | Gray         | 0.0502                |
| 94            | F            | Cream       | Red          | 0.0400                |
| 95            | B            | Cream       | Green        | 0.0463                |
| 96            | A            | Ultra Cream | Salmon       | 0.0363                |
| 97            | B            | Varnish     | Purple       | 0.0422                |
| 98            | E            | Cream       | Red          | 0.0515                |
| 99            | A            | Metallic    | Pink         | 0.0433                |
| 100           | B            | Natural     | Transparent  | 0.0625                |

**Table S2.** Concentration results for each nail polish samples. Values in mg kg<sup>-1</sup> with standard deviation. NI means Not Identified or under quantification limit.

| <b>N°</b> | <b>S (x10<sup>5</sup>)</b> | <b>Ca</b> | <b>Ti (x10<sup>5</sup>)</b> | <b>Fe</b> | <b>Cu</b> | <b>Zn</b> | <b>Bi</b> |
|-----------|----------------------------|-----------|-----------------------------|-----------|-----------|-----------|-----------|
| 1         | NI                         | 322 ± 46  | 0.049 ± 0.001               | 284 ± 12  | NI        | 27 ± 2    | NI        |
| 2         | 0.30 ± 0.01                | 249 ± 94  | 0.041 ± 0.002               | 441 ± 31  | NI        | NI        | NI        |
| 3         | 0.34 ± 0.04                | 841 ± 10  | 0.014 ± 0.0010              | 48 ± 9    | NI        | NI        | NI        |
| 4         | 1.24 ± 0.13                | 475 ± 48  | 0.0007 ± 0.0003             | 19 ± 14   | NI        | 18 ± 6    | NI        |
| 5         | 0.41 ± 0.03                | 442 ± 62  | 0.050 ± 0.001               | 203 ± 6   | NI        | NI        | NI        |
| 6         | 0.44 ± 0.02                | 544 ± 56  | 0.022 ± 0.001               | 148 ± 10  | NI        | 20 ± 2    | NI        |
| 7         | 0.32 ± 0.01                | 281 ± 44  | 0.054 ± 0.002               | 36 ± 2    | 73 ± 1    | NI        | NI        |
| 8         | 0.48 ± 0.03                | 393 ± 24  | 0.022 ± 0.001               | 408 ± 10  | NI        | 93 ± 6    | NI        |
| 9         | 0.81 ± 0.01                | 170 ± 57  | 0.077 ± 0.002               | NI        | NI        | 46 ± 1    | NI        |
| 10        | 0.37 ± 0.03                | 445 ± 62  | 0.022 ± 0.001               | 47 ± 1    | NI        | NI        | NI        |
| 11        | 0.18 ± 0.01                | 189 ± 52  | 0.0322 ± 0.0005             | 68 ± 1    | NI        | NI        | NI        |

|    |                 |               |                     |                |              |                |              |
|----|-----------------|---------------|---------------------|----------------|--------------|----------------|--------------|
| 12 | $0.56 \pm 0.04$ | $837 \pm 26$  | $0.0012 \pm 0.0003$ | $4050 \pm 187$ | NI           | $87 \pm 6$     | NI           |
| 13 | $0.29 \pm 0.01$ | $83 \pm 8$    | $0.0213 \pm 0.0005$ | NI             | NI           | NI             | NI           |
| 14 | $0.67 \pm 0.04$ | $671 \pm 137$ | $0.036 \pm 0.001$   | $3820 \pm 105$ | NI           | $121 \pm 2$    | NI           |
| 15 | $0.30 \pm 0.02$ | $361 \pm 75$  | $0.065 \pm 0.003$   | $73 \pm 8$     | NI           | NI             | NI           |
| 16 | $0.23 \pm 0.02$ | $278 \pm 24$  | $0.015 \pm 0.001$   | $11 \pm 3$     | NI           | NI             | NI           |
| 17 | $0.28 \pm 0.01$ | $415 \pm 39$  | $0.0030 \pm 0.0003$ | $56 \pm 6$     | NI           | $1348 \pm 76$  | NI           |
| 18 | $0.46 \pm 0.03$ | $289 \pm 112$ | $0.060 \pm 0.003$   | $71 \pm 14$    | $623 \pm 49$ | $2287 \pm 121$ | NI           |
| 19 | NI              | $2156 \pm 87$ | NI                  | $410 \pm 36$   | $402 \pm 23$ | $191 \pm 12$   | NI           |
| 20 | NI              | $1129 \pm 69$ | $0.0127 \pm 0.0002$ | $2085 \pm 43$  | $78 \pm 1$   | $79 \pm 17$    | NI           |
| 21 | NI              | $311 \pm 47$  | $0.030 \pm 0.002$   | $149 \pm 6$    | $306 \pm 28$ | $1578 \pm 113$ | NI           |
| 22 | $0.08 \pm 0.01$ | $675 \pm 13$  | $0.0004 \pm 0.0001$ | $209 \pm 2$    | NI           | NI             | NI           |
| 23 | NI              | $465 \pm 141$ | $0.0709 \pm 0.0005$ | $668 \pm 10$   | NI           | $161 \pm 7$    | NI           |
| 24 | $0.34 \pm 0.02$ | $371 \pm 41$  | $0.0062 \pm 0.0001$ | $27 \pm 3$     | NI           | $4 \pm 1$      | $935 \pm 11$ |
| 25 | $0.91 \pm 0.04$ | $373 \pm 69$  | $0.030 \pm 0.002$   | $45 \pm 10$    | NI           | NI             | NI           |
| 26 | $0.46 \pm 0.02$ | $281 \pm 28$  | $0.010 \pm 0.001$   | $707 \pm 35$   | NI           | NI             | NI           |
| 27 | $0.95 \pm 0.02$ | $537 \pm 41$  | $0.017 \pm 0.001$   | $540 \pm 36$   | NI           | NI             | NI           |

|    |                 |               |                     |                 |              |                |    |
|----|-----------------|---------------|---------------------|-----------------|--------------|----------------|----|
| 28 | $0.54 \pm 0.02$ | $248 \pm 34$  | $0.039 \pm 0.001$   | $172 \pm 18$    | NI           | NI             | NI |
| 29 | $0.90 \pm 0.01$ | $236 \pm 65$  | $0.044 \pm 0.001$   | $851 \pm 34$    | NI           | NI             | NI |
| 30 | $0.61 \pm 0.01$ | $307 \pm 39$  | $0.0238 \pm 0.0004$ | $38 \pm 7$      | NI           | NI             | NI |
| 31 | $0.38 \pm 0.01$ | $244 \pm 43$  | $0.0036 \pm 0.0002$ | $44 \pm 8$      | NI           | $1801 \pm 162$ | NI |
| 32 | NI              | $143 \pm 45$  | NI                  | NI              | $213 \pm 1$  | $588 \pm 29$   | NI |
| 33 | $0.70 \pm 0.02$ | $459 \pm 18$  | $0.152 \pm 0.011$   | NI              | $118 \pm 81$ | $73 \pm 6$     | NI |
| 34 | $0.56 \pm 0.04$ | $455 \pm 4$   | $0.146 \pm 0.001$   | $328 \pm 14$    | NI           | $10 \pm 4$     | NI |
| 35 | $0.84 \pm 0.08$ | $423 \pm 193$ | $0.035 \pm 0.001$   | $6179 \pm 91$   | NI           | NI             | NI |
| 36 | $0.19 \pm 0.04$ | $260 \pm 8$   | $0.147 \pm 0.003$   | $48 \pm 9$      | NI           | $22 \pm 2$     | NI |
| 37 | $0.45 \pm 0.12$ | $462 \pm 68$  | $0.0110 \pm 0.0003$ | $10958 \pm 539$ | NI           | $35 \pm 5$     | NI |
| 38 | $0.67 \pm 0.06$ | $704 \pm 14$  | $0.0026 \pm 0.0002$ | $377 \pm 26$    | NI           | $25 \pm 4$     | NI |
| 39 | $0.42 \pm 0.04$ | $434 \pm 37$  | NI                  | $58 \pm 3$      | NI           | $3 \pm 1$      | NI |
| 40 | $0.39 \pm 0.02$ | $610 \pm 39$  | $0.0085 \pm 0.0001$ | $2025 \pm 61$   | NI           | $51 \pm 4$     | NI |
| 41 | $0.71 \pm 0.04$ | $128 \pm 30$  | $0.114 \pm 0.003$   | $99 \pm 14$     | $97 \pm 9$   | $27 \pm 19$    | NI |
| 42 | $0.36 \pm 0.03$ | $485 \pm 14$  | $0.023 \pm 0.001$   | $394 \pm 22$    | NI           | NI             | NI |
| 43 | $0.46 \pm 0.01$ | $471 \pm 101$ | $0.060 \pm 0.001$   | $72 \pm 6$      | NI           | $6 \pm 1$      | NI |

---

---

|    |                 |               |                       |                  |              |             |              |
|----|-----------------|---------------|-----------------------|------------------|--------------|-------------|--------------|
| 44 | $0.49 \pm 0.02$ | $673 \pm 46$  | $0.0129 \pm 0.0003$   | NI               | NI           | $55 \pm 1$  | NI           |
| 45 | $0.54 \pm 0.01$ | $36 \pm 40$   | $0.101 \pm 0.003$     | $2702 \pm 68$    | NI           | NI          | NI           |
| 46 | $1.20 \pm 0.07$ | $1480 \pm 48$ | $0.0002 \pm 0.0001$   | NI               | $19 \pm 12$  | $71 \pm 13$ | NI           |
| 47 | $0.61 \pm 0.04$ | $173 \pm 63$  | $0.0029 \pm 0.0003$   | NI               | NI           | NI          | NI           |
| 48 | NI              | $259 \pm 38$  | $0.031 \pm 0.001$     | $1876 \pm 62$    | NI           | $8 \pm 2$   | NI           |
| 49 | NI              | $627 \pm 23$  | NI                    | $688 \pm 17$     | $91 \pm 5$   | $90 \pm 8$  | NI           |
| 50 | $0.66 \pm 0.05$ | $493 \pm 55$  | $0.038 \pm 0.001$     | NI               | NI           | NI          | NI           |
| 51 | NI              | NI            | $0.0027 \pm 0.0004$   | $33508 \pm 1590$ | NI           | NI          | NI           |
| 52 | $0.46 \pm 0.02$ | $494 \pm 24$  | $0.043 \pm 0.001$     | $54 \pm 4$       | NI           | $42 \pm 3$  | NI           |
| 53 | $0.43 \pm 0.04$ | $69 \pm 29$   | $0.0093 \pm 0.0004$   | NI               | NI           | NI          | NI           |
| 54 | $0.66 \pm 0.04$ | $240 \pm 56$  | $0.159 \pm 0.004$     | $103 \pm 1$      | $337 \pm 20$ | NI          | NI           |
| 55 | $0.39 \pm 0.04$ | $246 \pm 22$  | $0.0030 \pm 0.0002$   | $56 \pm 10$      | NI           | NI          | NI           |
| 56 | $0.36 \pm 0.01$ | $301 \pm 12$  | $0.0008 \pm 0.0001$   | $52 \pm 4$       | $24 \pm 3$   | $20 \pm 2$  | NI           |
| 57 | NI              | $661 \pm 527$ | $0.014 \pm 0.005$     | $42637 \pm 506$  | NI           | $17 \pm 3$  | NI           |
| 58 | $0.36 \pm 0.01$ | $128 \pm 17$  | $0.00013 \pm 0.00006$ | $274 \pm 217$    | NI           | $53 \pm 9$  | $824 \pm 17$ |
| 59 | $0.21 \pm 0.02$ | $290 \pm 27$  | $0.021 \pm 0.001$     | $4908 \pm 845$   | NI           | NI          | NI           |

---

|    |                 |               |                     |                |                |              |                |
|----|-----------------|---------------|---------------------|----------------|----------------|--------------|----------------|
| 60 | $0.10 \pm 0.01$ | $299 \pm 11$  | $0.0137 \pm 0.0005$ | $972 \pm 54$   | $2184 \pm 107$ | $468 \pm 12$ | $3884 \pm 28$  |
| 61 | $0.30 \pm 0.03$ | $296 \pm 28$  | $0.034 \pm 0.002$   | $29 \pm 4$     | NI             | NI           | $1644 \pm 17$  |
| 62 | $0.18 \pm 0.03$ | $416 \pm 64$  | $0.035 \pm 0.001$   | $185 \pm 11$   | NI             | NI           | NI             |
| 64 | $0.15 \pm 0.01$ | $231 \pm 38$  | $0.027 \pm 0.001$   | NI             | NI             | NI           | NI             |
| 65 | $0.41 \pm 0.03$ | $300 \pm 37$  | $0.0002 \pm 0.0001$ | $33 \pm 6$     | $59 \pm 4$     | NI           | $2496 \pm 19$  |
| 66 | $0.54 \pm 0.07$ | $258 \pm 37$  | NI                  | $39 \pm 6$     | NI             | NI           | NI             |
| 67 | $0.39 \pm 0.02$ | $705 \pm 16$  | $0.0055 \pm 0.0002$ | $23 \pm 5$     | $43 \pm 3$     | $7 \pm 2$    | NI             |
| 68 | $0.36 \pm 0.01$ | NI            | $0.052 \pm 0.001$   | NI             | NI             | NI           | NI             |
| 69 | $1.37 \pm 0.01$ | $586 \pm 115$ | $0.184 \pm 0.002$   | $136 \pm 5$    | NI             | NI           | NI             |
| 70 | $0.36 \pm 0.01$ | $918 \pm 36$  | $0.0033 \pm 0.0002$ | $28 \pm 3$     | NI             | NI           | NI             |
| 71 | $0.23 \pm 0.03$ | $298 \pm 54$  | $0.016 \pm 0.001$   | $4027 \pm 390$ | NI             | $33 \pm 4$   | NI             |
| 72 | $0.25 \pm 0.01$ | $132 \pm 36$  | $0.095 \pm 0.005$   | $24 \pm 2$     | $43 \pm 7$     | $17 \pm 6$   | NI             |
| 73 | NI              | $283 \pm 41$  | $0.0025 \pm 0.0019$ | $6376 \pm 122$ | NI             | $38 \pm 1$   | NI             |
| 74 | $0.02 \pm 0.01$ | $312 \pm 44$  | $0.165 \pm 0.011$   | NI             | NI             | $8 \pm 5$    | $11283 \pm 34$ |
| 75 | $0.32 \pm 0.01$ | $196 \pm 6$   | NI                  | $51 \pm 10$    | NI             | $27 \pm 1$   | $5688 \pm 24$  |
| 76 | $0.36 \pm 0.02$ | $219 \pm 112$ | $0.0134 \pm 0.0004$ | $842 \pm 15$   | NI             | NI           | NI             |



|    |             |           |                 |            |         |          |           |
|----|-------------|-----------|-----------------|------------|---------|----------|-----------|
| 77 | NI          | 233 ± 13  | 0.045 ± 0.002   | 405 ± 21   | NI      | NI       | 1910 ± 19 |
| 78 | 0.73 ± 0.03 | NI        | 0.063 ± 0.001   | 6630 ± 251 | NI      | 3 ± 1    | NI        |
| 79 | NI          | 800 ± 26  | 0.018 ± 0.001   | 1102 ± 42  | NI      | NI       | NI        |
| 80 | 0.28 ± 0.02 | 256 ± 18  | 0.0127 ± 0.0002 | 22 ± 5     | 182 ± 6 | 12 ± 4   | NI        |
| 81 | 0.61 ± 0.01 | 368 ± 68  | 0.033 ± 0.002   | 46 ± 3     | NI      | NI       | NI        |
| 82 | 0.41 ± 0.01 | 394 ± 36  | 0.017 ± 0.001   | 27 ± 3     | NI      | NI       | NI        |
| 83 | NI          | 495 ± 133 | 0.242 ± 0.002   | 638 ± 24   | NI      | 47 ± 8   | NI        |
| 84 | 0.46 ± 0.01 | 495 ± 79  | 0.009 ± 0.001   | 2503 ± 52  | NI      | 122 ± 13 | NI        |
| 85 | 0.01 ± 0.01 | 259 ± 20  | 0.045 ± 0.001   | 12 ± 6     | NI      | NI       | 427 ± 11  |
| 86 | 0.38 ± 0.01 | 151 ± 102 | 0.080 ± 0.005   | 254 ± 33   | NI      | NI       | NI        |
| 87 | 0.43 ± 0.01 | 202 ± 36  | 0.018 ± 0.001   | 1845 ± 33  | NI      | 14 ± 4   | NI        |
| 88 | NI          | 161 ± 16  | 0.027 ± 0.002   | 272 ± 222  | NI      | 9 ± 1    | NI        |
| 89 | 0.39 ± 0.02 | 317 ± 25  | 0.0052 ± 0.0003 | 41 ± 5     | 10 ± 2  | 3 ± 1    | NI        |
| 90 | 0.53 ± 0.01 | 25 ± 54   | 0.040 ± 0.003   | NI         | NI      | 10 ± 3   | NI        |
| 91 | 0.30 ± 0.01 | 167 ± 28  | 0.048 ± 0.001   | 149 ± 7    | NI      | 27 ± 6   | NI        |
| 92 | 0.02 ± 0.01 | 236 ± 4   | 0.130 ± 0.005   | 22 ± 4     | NI      | 9 ± 3    | 774 ± 14  |

---

---

|     |                 |                |                     |               |    |               |              |
|-----|-----------------|----------------|---------------------|---------------|----|---------------|--------------|
| 93  | $0.02 \pm 0.01$ | $182 \pm 45$   | $0.013 \pm 0.009$   | $656 \pm 476$ | NI | NI            | $427 \pm 10$ |
| 94  | $0.14 \pm 0.03$ | $1609 \pm 183$ | $0.074 \pm 0.004$   | $512 \pm 31$  | NI | $16 \pm 3$    | NI           |
| 95  | NI              | $128 \pm 52$   | $0.053 \pm 0.001$   | $1800 \pm 37$ | NI | NI            | NI           |
| 96  | $0.52 \pm 0.02$ | $211 \pm 52$   | $0.064 \pm 0.001$   | $1520 \pm 25$ | NI | NI            | NI           |
| 97  | NI              | $612 \pm 35$   | $0.047 \pm 0.003$   | $803 \pm 64$  | NI | $1.8 \pm 0.6$ | NI           |
| 98  | $0.37 \pm 0.07$ | $216 \pm 46$   | $0.0073 \pm 0.0002$ | NI            | NI | NI            | NI           |
| 99  | $0.37 \pm 0.02$ | $358 \pm 49$   | $0.053 \pm 0.001$   | $128 \pm 1$   | NI | NI            | NI           |
| 100 | NI              | $98 \pm 21$    | $0.027 \pm 0.001$   | $30 \pm 6$    | NI | $29 \pm 1$    | NI           |

---

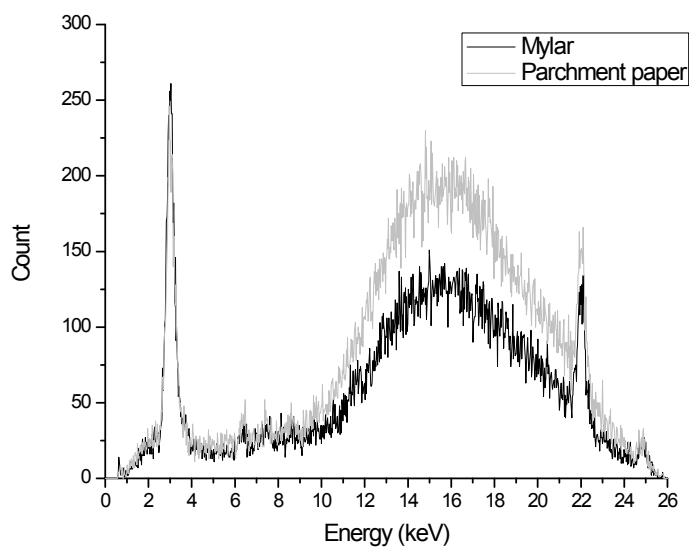

**Figure S1.** Spectra from mylar film and parchment paper used to spread the nail polish samples.

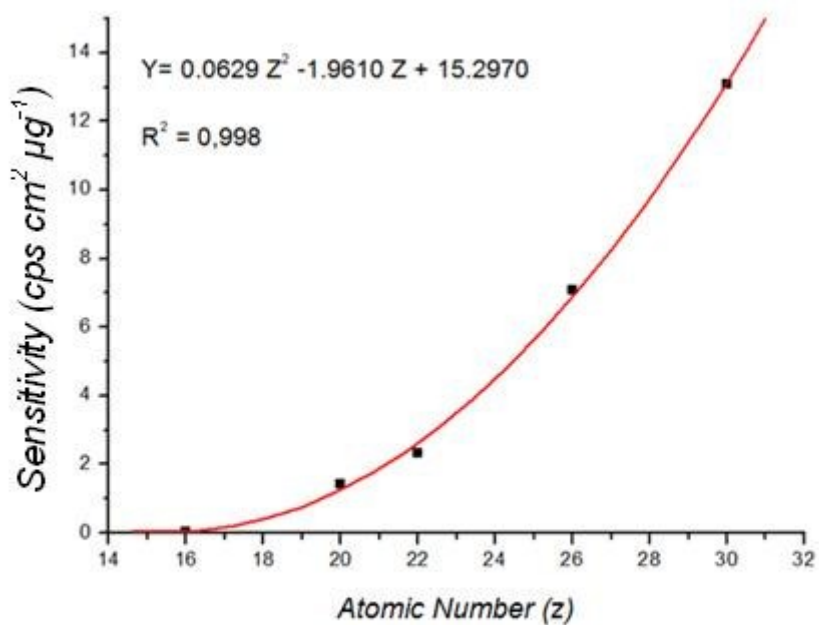

**Figure S2.** Element Sensitivity for K $\alpha$  line versus atomic number (Z) obtained from MicroMatter membrane standards.
